# Supplementary material for: Comparative transcriptome analysis of major lodging resistant factors in hulless barley
Source: Front Plant Sci. 2023 Oct 13;14:1230792. doi: 10.3389/fpls.2023.1230792 (PMC10613528; doi:10.3389/fpls.2023.1230792)
Supplement: Supplementary file 1 [file Table_1.xlsx]

## Sheet: Table S1
Table S1 Mapping reference statistics
Sample	Total	Unmapped(%)	Unique_Mapped(%)	Multiple_Mapped(%)	Total_Mapped(%)
P1-194-1	45912630	3320075 (7.23%)	37401845 (81.46%)	5190710 (11.31%)	42592555 (92.77%)
P1-194-2	44631664	3164149 (7.09%)	36449940 (81.67%)	5017575 (11.24%)	41467515 (92.91%)
P1-194-3	35150292	2584967 (7.35%)	28842129 (82.05%)	3723196 (10.59%)	32565325 (92.65%)
P1-360-1	47971116	3485261 (7.27%)	39361121 (82.05%)	5124734 (10.68%)	44485855 (92.73%)
P1-360-2	46830566	3329403 (7.11%)	38108671 (81.38%)	5392492 (11.51%)	43501163 (92.89%)
P1-360-3	38877912	2997901 (7.71%)	31706975 (81.56%)	4173036 (10.73%)	35880011 (92.29%)
P2-194-1	51482976	3530714 (6.86%)	42065638 (81.71%)	5886624 (11.43%)	47952262 (93.14%)
P2-194-2	54866110	3813979 (6.95%)	44688319 (81.45%)	6363812 (11.60%)	51052131 (93.05%)
P2-194-3	36681716	2651058 (7.23%)	30098763 (82.05%)	3931895 (10.72%)	34030658 (92.77%)
P2-360-1	52372934	3566132 (6.81%)	42355688 (80.87%)	6451114 (12.32%)	48806802 (93.19%)
P2-360-2	43926198	2976800 (6.78%)	35937495 (81.81%)	5011903 (11.41%)	40949398 (93.22%)
P2-360-3	38696878	2993783 (7.74%)	31488127 (81.37%)	4214968 (10.89%)	35703095 (92.26%)
P3-194-1	55879292	4133882 (7.40%)	45509842 (81.44%)	6235568 (11.16%)	51745410 (92.60%)
P3-194-2	46884742	3393560 (7.24%)	38231444 (81.54%)	5259738 (11.22%)	43491182 (92.76%)
P3-194-3	35704886	2927388 (8.20%)	29189335 (81.75%)	3588163 (10.05%)	32777498 (91.80%)
P3-360-1	53823184	4147298 (7.71%)	44138947 (82.01%)	5536939 (10.29%)	49675886 (92.29%)
P3-360-2	58571792	4390006 (7.50%)	48105809 (82.13%)	6075977 (10.37%)	54181786 (92.50%)
P3-360-3	36774538	2969687 (8.08%)	30167040 (82.03%)	3637811 (9.89%)	33804851 (91.92%)
P4-194-1	43830740	3872355 (8.83%)	35597084 (81.21%)	4361301 (9.95%)	39958385 (91.17%)
P4-194-2	42995472	3737045 (8.69%)	34996007 (81.39%)	4262420 (9.91%)	39258427 (91.31%)
P4-194-3	35787290	2731836 (7.63%)	29393958 (82.14%)	3661496 (10.23%)	33055454 (92.37%)
P4-360-1	50012364	4277692 (8.55%)	40823299 (81.63%)	4911373 (9.82%)	45734672 (91.45%)
P4-360-2	54532868	4412066 (8.09%)	44505771 (81.61%)	5615031 (10.30%)	50120802 (91.91%)
P4-360-3	37507910	3013183 (8.03%)	30821783 (82.17%)	3672944 (9.79%)	34494727 (91.97%)
P5-194-1	51378514	4207355 (8.19%)	42162750 (82.06%)	5008409 (9.75%)	47171159 (91.81%)
P5-194-2	45623434	3797471 (8.32%)	37475435 (82.14%)	4350528 (9.54%)	41825963 (91.68%)
P5-194-3	36529318	2858800 (7.83%)	30250899 (82.81%)	3419619 (9.36%)	33670518 (92.17%)
P5-360-1	52530270	4633057 (8.82%)	42789495 (81.46%)	5107718 (9.72%)	47897213 (91.18%)
P5-360-2	42412130	4133061 (9.74%)	33969901 (80.09%)	4309168 (10.16%)	38279069 (90.26%)
P5-360-3	38084372	2784577 (7.31%)	31544464 (82.83%)	3755331 (9.86%)	35299795 (92.69%)

## Sheet: Table S2
Gene	Phytohormones
HORVU1Hr1G068760	ABA
HORVU2Hr1G017020
HORVU3Hr1G083250
HORVU5Hr1G045180
HORVU5Hr1G068230
HORVU6Hr1G080670
HORVU7Hr1G035500
HORVU1Hr1G070420
HORVU4Hr1G055220
HORVU1Hr1G090360
HORVU1Hr1G094840
HORVU2Hr1G000090
HORVU3Hr1G050340
HORVU3Hr1G059170
HORVU3Hr1G067380
HORVU0Hr1G011570
HORVU1Hr1G055340
HORVU1Hr1G074670
HORVU2Hr1G029900
HORVU2Hr1G075470
HORVU2Hr1G110230
HORVU2Hr1G125950
HORVU4Hr1G013540
HORVU5Hr1G018340
HORVU5Hr1G097630
HORVU7Hr1G118150
HORVU1Hr1G073490	Auxin
HORVU3Hr1G084750
HORVU4Hr1G019930
HORVU4Hr1G063650
HORVU0Hr1G021630
HORVU1Hr1G025670
HORVU1Hr1G028170
HORVU1Hr1G086070
HORVU3Hr1G019750
HORVU3Hr1G022540
HORVU3Hr1G070620
HORVU3Hr1G088810
HORVU4Hr1G016160
HORVU5Hr1G014290
HORVU5Hr1G014300
HORVU5Hr1G093580
HORVU5Hr1G093640
HORVU5Hr1G094220
HORVU5Hr1G106350
HORVU6Hr1G088140
HORVU6Hr1G091260
HORVU7Hr1G026970
HORVU7Hr1G077110
HORVU7Hr1G084940
HORVU1Hr1G076690
HORVU1Hr1G087460
HORVU2Hr1G076920
HORVU3Hr1G022060
HORVU2Hr1G019970
HORVU2Hr1G034670
HORVU3Hr1G074230
HORVU2Hr1G092070
HORVU2Hr1G098310
HORVU2Hr1G110420
HORVU2Hr1G110460
HORVU4Hr1G002600
HORVU5Hr1G062580
HORVU6Hr1G020840
HORVU6Hr1G027640
HORVU6Hr1G080050
HORVU6Hr1G080060
HORVU7Hr1G017790
HORVU7Hr1G096870
HORVU7Hr1G096880
HORVU7Hr1G107340
HORVU7Hr1G107360
HORVU3Hr1G068000	BR
HORVU5Hr1G068600
HORVU1Hr1G052420
HORVU2Hr1G123650
HORVU7Hr1G078530
HORVU0Hr1G040070
HORVU7Hr1G098330
HORVU7Hr1G098440
HORVU3Hr1G094870	cytokinin
HORVU4Hr1G008210
HORVU1Hr1G027980
HORVU1Hr1G075830
HORVU4Hr1G051390
HORVU6Hr1G054390
HORVU6Hr1G068570
HORVU6Hr1G085560
HORVU7Hr1G030000
HORVU7Hr1G030020
HORVU7Hr1G030050
HORVU2Hr1G077000
HORVU2Hr1G120490
HORVU3Hr1G108540
HORVU5Hr1G043090
HORVU6Hr1G059200
HORVU0Hr1G001750	ETR
HORVU1Hr1G022550
HORVU5Hr1G000590
HORVU6Hr1G080170
HORVU6Hr1G091700
HORVU5Hr1G073380
HORVU7Hr1G090210
HORVU7Hr1G090240
HORVU2Hr1G093660
HORVU3Hr1G055460
HORVU4Hr1G000700
HORVU1Hr1G060810	GA
HORVU1Hr1G050560	JA
HORVU1Hr1G073230
HORVU4Hr1G060950
HORVU2Hr1G070880
HORVU4Hr1G076820
HORVU4Hr1G076840
HORVU5Hr1G060730
HORVU5Hr1G062290
HORVU7Hr1G041230
HORVU7Hr1G041260
HORVU7Hr1G041300
HORVU3Hr1G029670
HORVU5Hr1G056040	SA
HORVU5Hr1G106010
HORVU7Hr1G033530
HORVU7Hr1G033620
HORVU7Hr1G040730
HORVU7Hr1G040740
HORVU0Hr1G015710
HORVU0Hr1G032230
HORVU1Hr1G068220
HORVU1Hr1G073870
HORVU2Hr1G116090
HORVU2Hr1G116130
HORVU3Hr1G042790
HORVU3Hr1G079010
HORVU3Hr1G084340
HORVU4Hr1G025130
HORVU4Hr1G052330
HORVU5Hr1G053330
HORVU3Hr1G019230
HORVU3Hr1G074640
HORVU3Hr1G106880
HORVU4Hr1G003040
HORVU5Hr1G055950
